# Supplementary material for: MicroRNA Mediated Changes in Drug Metabolism and Target Gene Expression by Efavirenz and Rifampicin In Vitro: Clinical Implications
Source: PubMed Central journal article supplement (PMC6806364; doi:10.1089/omi.2019.0122), 2019-10-04
Supplement: Supp_FigureS1.pdf [file Supp_FigureS1.pdf]

## Supplementary Data

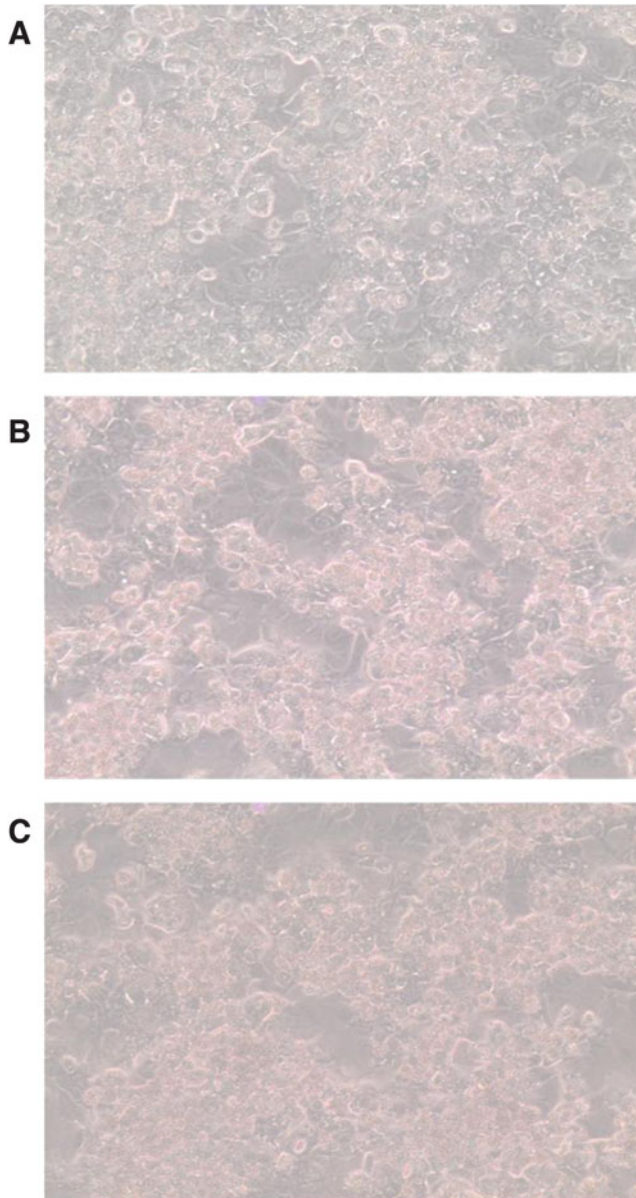

**SUPPLEMENTARY FIG. S1.** Representative images showing no effects of DMSO and drug treatments (efavirenz and rifampicin) on HepaRG cell morphology after 24 h at 20× magnification. (A) HepaRG cells treated with 0.02% DMSO; (B) HepaRG cells exposed to efavirenz (6.4 μM); (C) HepaRG cells exposed to rifampicin (24.4 μM). DMSO, dimethyl sulfoxide.
