# Supplementary material for: MicroRNA Mediated Changes in Drug Metabolism and Target Gene Expression by Efavirenz and Rifampicin In Vitro: Clinical Implications
Source: PubMed Central journal article supplement (PMC6806364; doi:10.1089/omi.2019.0122), 2019-10-04
Supplement: Supp_FigureS2.pdf [file Supp_FigureS2.pdf]

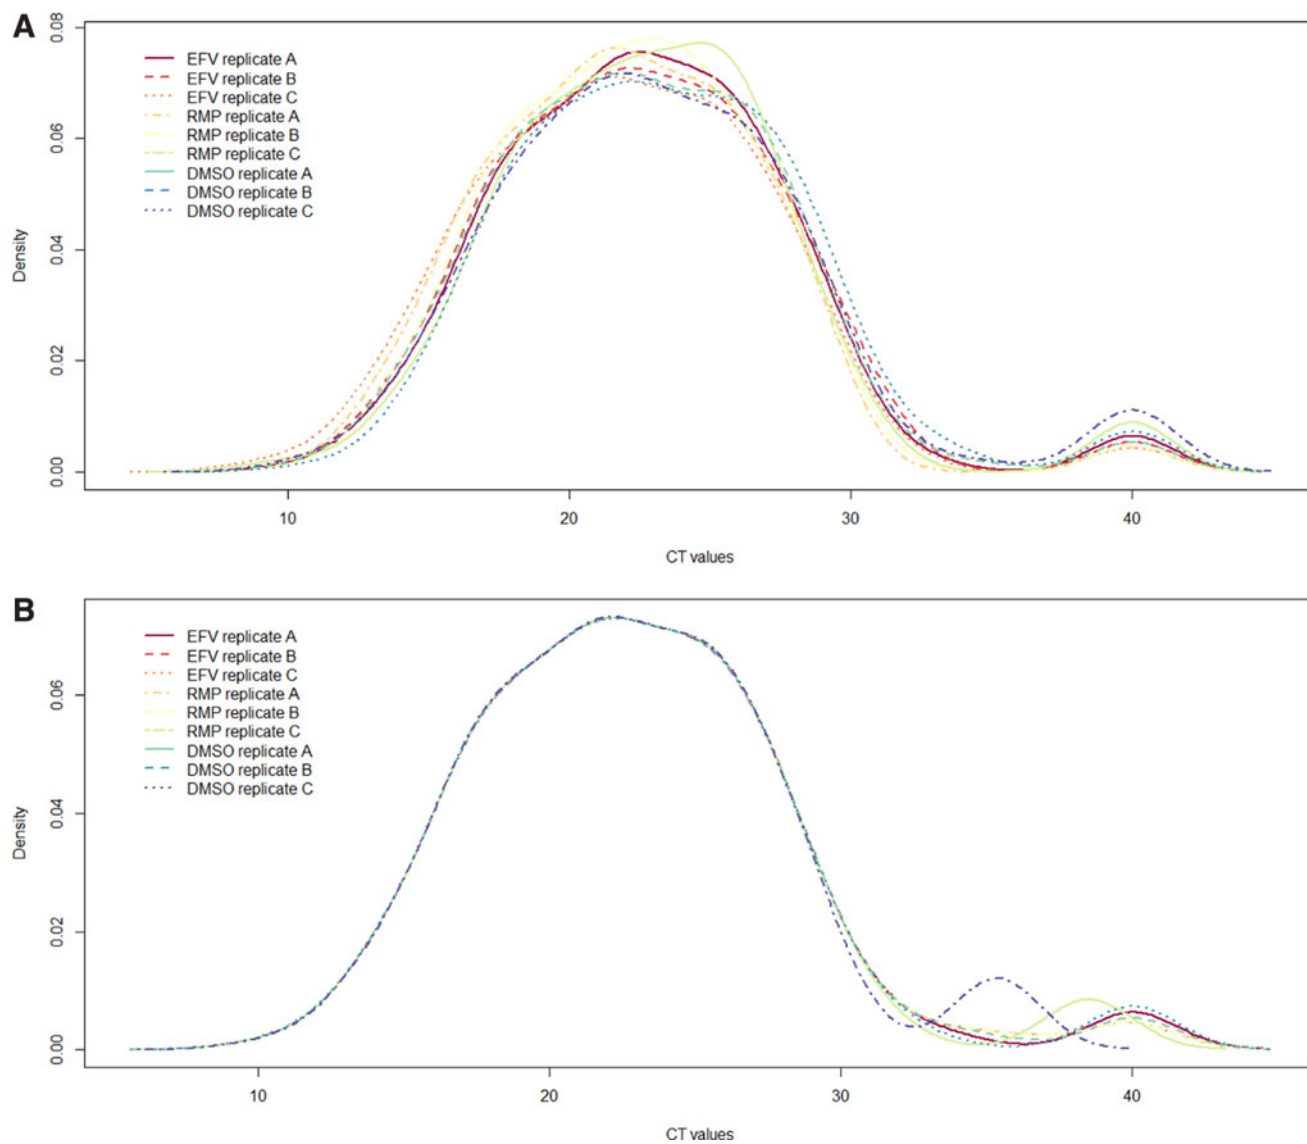

**SUPPLEMENTARY FIG. S2.** Changes in distribution of  $C_T$  values of microRNA expression before and after quantile normalization. **(A)** Distribution of  $C_T$  values before normalization; **(B)** distribution of  $C_T$  values after quantile normalization.
