# Supplementary material for: MicroRNA Mediated Changes in Drug Metabolism and Target Gene Expression by Efavirenz and Rifampicin In Vitro: Clinical Implications
Source: PubMed Central journal article supplement (PMC6806364; doi:10.1089/omi.2019.0122), 2019-10-04
Supplement: Supp_TableS1-S2.pdf [file Supp_TableS1-S2.pdf]

SUPPLEMENTARY TABLE S1. DIFFERENTIALLY EXPRESSED MICRORNAs AFTER TREATMENT WITH EFVAVIRENZ USING QUANTILE NORMALIZATION AND LIMMA ANALYSIS

| <i>Differentially expressed microRNAs</i> | <i>Unadjusted p-value</i> | <i>Benjamini/Holm adjusted p-value</i> | <i>Fold change</i> |
|-------------------------------------------|---------------------------|----------------------------------------|--------------------|
| hsa-miR-195                               | 0.000337276459063447      | 0.0515786962536653                     | 0.396432775290664  |
| hsa-miR-93#                               | 0.000942522156040335      | 0.0515786962536653                     | 2.06564536859351   |
| hsa-miR-181c                              | 0.000982899486009876      | 0.0515786962536653                     | 0.469472029289138  |
| hsa-miR-22#                               | 0.00107009743264866       | 0.0515786962536653                     | 1.76255303254325   |
| hsa-miR-203                               | 0.00382764191965445       | 0.153743617106121                      | 0.587939960004118  |
| hsa-miR-29b                               | 0.00476496657292314       | 0.16405099201064                       | 1.72278269924197   |
| hsa-miR-876-3p                            | 0.00718623839695659       | 0.216485431708317                      | 0.132256213447353  |
| hsa-miR-548d                              | 0.0098394947687518        | 0.263479804363243                      | 621.891254366142   |
| hsa-miR-383                               | 0.0130866556255003        | 0.315388400574557                      | 1.3077720644938    |
| hsa-miR-30b                               | 0.0157387017838264        | 0.343467471893807                      | 0.690424495398716  |
| hsa-miR-210                               | 0.0187419217968033        | 0.347446396386892                      | 0.689804410956658  |
| hsa-miR-193a-3p                           | 0.0209508305696285        | 0.359145184133895                      | 0.173869173414376  |
| hsa-miR-197                               | 0.0226467075579982        | 0.359145184133895                      | 0.683827195189982  |
| hsa-miR-221                               | 0.0238436636769391        | 0.359145184133895                      | 1.41055142060532   |
| hsa-miR-122#                              | 0.0257091138252294        | 0.361853384863971                      | 2.72514563888616   |
| hsa-miR-885-5p                            | 0.0270263938902551        | 0.361853384863971                      | 0.662911823131997  |
| hsa-miR-422a                              | 0.0332292593349066        | 0.406836787743004                      | 0.121127016829242  |
| hsa-miR-27a                               | 0.0337623890243157        | 0.406836787743004                      | 1.35260513953923   |
| hsa-miR-25                                | 0.0428679221017306        | 0.443614181560503                      | 0.773742768520296  |
| hsa-let-7a                                | 0.0429671317990044        | 0.443614181560503                      | 0.780105278894354  |
| hsa-miR-19a                               | 0.0447457123801481        | 0.443614181560503                      | 0.664496420586468  |
| hsa-miR-27b                               | 0.0450616434097777        | 0.443614181560503                      | 1.236624426065     |
| hsa-miR-216b                              | 0.0460180686266081        | 0.443614181560503                      | 0.604329556215936  |
| hsa-miR-622                               | 0.0484155942748276        | 0.448775316162825                      | 1.48631586229885   |

SUPPLEMENTARY TABLE S2. DIFFERENTIALLY EXPRESSED MICRORNAs AFTER TREATMENT WITH RIFAMPICIN USING QUANTILE NORMALIZATION AND LIMMA ANALYSIS

| <i>Differentially expressed microRNAs</i> | <i>Unadjusted p-value</i> | <i>Benjamini/Holm adjusted p-value</i> | <i>Fold change</i> |
|-------------------------------------------|---------------------------|----------------------------------------|--------------------|
| hsa-miR-22#                               | 0.000492154762165706      | 0.118609297681935                      | 1.90654814481948   |
| hsa-miR-203                               | 0.00167085881913639       | 0.201338487705935                      | 0.539309437481509  |
| hsa-miR-425#                              | 0.00666464240690603       | 0.409208432368125                      | 0.480642803154659  |
| hsa-miR-29b-2#                            | 0.0110343263364336        | 0.409208432368125                      | 2.05185093725171   |
| hsa-miR-125b-1#                           | 0.0113656209862097        | 0.409208432368125                      | 0.341229626224244  |
| hsa-miR-20b                               | 0.0121437333199812        | 0.409208432368125                      | 2.480816135972     |
| hsa-miR-625#                              | 0.0124533427596102        | 0.409208432368125                      | 0.48029743197674   |
| hsa-miR-128a                              | 0.0135836824022614        | 0.409208432368125                      | 1.71119005136521   |
| hsa-miR-139-5p                            | 0.0196115340325911        | 0.427138625325539                      | 0.575884681420726  |
| hsa-miR-195                               | 0.0199352066620266        | 0.427138625325539                      | 0.649235959705979  |
| hsa-miR-577                               | 0.0231811088640087        | 0.427138625325539                      | 1.68797822847066   |
| hsa-miR-642                               | 0.0234346951794707        | 0.427138625325539                      | 0.645546351447115  |
| hsa-miR-876-3p                            | 0.0277549132096698        | 0.427138625325539                      | 0.223440554323334  |
| hsa-miR-1291                              | 0.0289507256434038        | 0.427138625325539                      | 1.6856830895094    |
| mmu-miR-93                                | 0.0307026844036966        | 0.427138625325539                      | 1.63119123226095   |
| hsa-let-7a                                | 0.031364872002381         | 0.427138625325539                      | 0.763462726769337  |
| hsa-miR-500                               | 0.0319024699413266        | 0.427138625325539                      | 0.564960622997247  |
| hsa-miR-1260                              | 0.03802433990887          | 0.433210303965054                      | 0.446307857416551  |
| hsa-miR-212                               | 0.0390896042842577        | 0.433210303965054                      | 1.54744581031954   |
| hsa-miR-885-5p                            | 0.0407928620218925        | 0.433210303965054                      | 0.69102739688754   |
| hsa-miR-597                               | 0.0413437219551711        | 0.433210303965054                      | 0.622117614141279  |
| hsa-miR-93#                               | 0.0440721946576306        | 0.442558288020374                      | 1.38852731262891   |
| hsa-miR-99a                               | 0.0463233767522586        | 0.446557351891773                      | 1.249982075793     |
