# Supplementary material for: MicroRNA Mediated Changes in Drug Metabolism and Target Gene Expression by Efavirenz and Rifampicin In Vitro: Clinical Implications
Source: PubMed Central journal article supplement (PMC6806364; doi:10.1089/omi.2019.0122), 2019-10-04
Supplement: Supp_TableS3.pdf [file Supp_TableS3.pdf]

SUPPLEMENTARY TABLE S3. TARGET GENES ACCORDING TO THE MiRTarBASE DATABASE

| <i>MicroRNA</i>                                             | <i>MiRTarBase target</i>                                                       |
|-------------------------------------------------------------|--------------------------------------------------------------------------------|
| Differentially expressed microRNAs after treatment with EFV |                                                                                |
| hsa-let-7a-5p                                               | AHR; ADH5; ALDH7A1; FMO4; NR1I2; SLC5A6; CYP2R1; SOD2                          |
| hsa-miR-122-3p                                              | ALDH5A1                                                                        |
| hsa-miR-122-5p                                              | CYP3A5; SLC15A2; CYP7A1; GSTM3; SLC7A5; CYP20A1; CHST12; CHST3; ATP7A          |
| hsa-miR-181c-5p                                             | ALDH9A1                                                                        |
| hsa-miR-193a-3p                                             | SLC7A5                                                                         |
| hsa-miR-195-5p                                              | SLC7A5; UGT2B4; ABCB7; ABCC6; ALDH3B1; SLC29A1; SLCO3A1                        |
| hsa-miR-197-3p                                              | ABCC3; CES1; GSTO1; GSTK1; GSTM5; HNF4A; SOD1; SOD2                            |
| hsa-miR-19a-3p                                              | ABCA1; SLC27A1; PPARA                                                          |
| hsa-miR-203a-3p                                             | GSTO2; CYP20A1; SOD2                                                           |
| hsa-miR-210-3p                                              | ALDH5A1; SLCO3A1                                                               |
| hsa-miR-216b-5p                                             | ABCC12; UGT2B28                                                                |
| hsa-miR-221-3p                                              | ARNT; CYP1B1                                                                   |
| hsa-miR-22-5p                                               | PDE3A                                                                          |
| hsa-miR-25-3p                                               | CYP2C19; NAT1                                                                  |
| hsa-miR-27a-3p                                              | DPYD; ABCA1; ALDH9A1; CYP1B1; PPARG; ATP7B                                     |
| hsa-miR-27b-3p                                              | CYP3A4; DPYD; ABCA1; CYP1B1; PPARG; SLC5A6; ATP7B                              |
| hsa-miR-29b-3p                                              | EPHX2; PPARD; SLC16A1; SLC29A2                                                 |
| hsa-miR-30b-5p                                              | SLC7A5; CAT                                                                    |
| hsa-miR-383-5p                                              | AHR; ALDH1B1                                                                   |
| hsa-miR-422a                                                | CYP7A1; CYP20A1; CYP8B1                                                        |
| hsa-miR-548d-3p                                             | SLC29A1; SLC2A4                                                                |
| hsa-miR-622                                                 | SLCO3A1                                                                        |
| hsa-miR-885-5p                                              | SULT1B1; SOD2                                                                  |
| hsa-miR-93-3p                                               | CBR1                                                                           |
| Differentially expressed microRNAs after exposure to RMP    |                                                                                |
| hsa-let-7a-5p                                               | AHR; ADH5; ALDH7A1; FMO4; NR1I2; SLC5A6; CYP2R1; SOD2                          |
| hsa-miR-125b-1-3p                                           | SOD2                                                                           |
| hsa-miR-1260a                                               | SLC7A5; SLC27A1; GSTCD; MGST3                                                  |
| hsa-miR-128-3p                                              | ALDH4A1; ABCA1; ABCG1; ALDH9A1; CYP20A1; RXRA; SLC16A1; SLC22A14; PDE3A; PDE3B |
| hsa-miR-1291                                                | ABCC1                                                                          |
| hsa-miR-195-5p                                              | SLC7A5; UGT2B4; ABCB7; ABCC6; ALDH3B1; SLC29A1; SLCO3A1                        |
| hsa-miR-203a-3p                                             | GSTO2; CYP20A1; SOD2                                                           |
| hsa-miR-20b-5p                                              | ABCA1; ALDH9A1; PPARG; SLC28A1; SLCO5A1; SOD2                                  |
| hsa-miR-212-3p                                              | CYP20A1; SOD2                                                                  |
| hsa-miR-22-5p                                               | PDE3A                                                                          |
| hsa-miR-29b-2-5p                                            | SLC7A5                                                                         |
| hsa-miR-500a-3p                                             | UGT2B10; SOD2                                                                  |
| hsa-miR-500a-5p                                             | GSTCD                                                                          |
| hsa-miR-577                                                 | SLC5A6; SOD2                                                                   |
| hsa-miR-642a-5p                                             | SLC22A6                                                                        |
| hsa-miR-885-5p                                              | SULT1B1; SOD2                                                                  |
| hsa-miR-93-3p                                               | CBR1                                                                           |
| hsa-miR-93-5p                                               | ABCA1; ALDH9A1; SLC19A1; SLC28A1; SLC29A2; SLC2A4; SLCO5A1; SOD2; PDE3B        |
| hsa-miR-99a-3p                                              | GSTM5                                                                          |

EFV, efavirenz; RMP, rifampicin.
