# Supplementary material for: MicroRNA Mediated Changes in Drug Metabolism and Target Gene Expression by Efavirenz and Rifampicin In Vitro: Clinical Implications
Source: PubMed Central journal article supplement (PMC6806364; doi:10.1089/omi.2019.0122), 2019-10-04
Supplement: Supp_TableS4.pdf [file Supp_TableS4.pdf]

SUPPLEMENTARY TABLE S4. POTENTIAL TARGET GENES PREDICTED BY INGENUITY PATHWAY ANALYSIS

| <i>MicroRNA</i>                                             | <i>IPA target (level of confidence for prediction)</i>                                                                                                                                                                                                                                                                                                                                                                                                                                                                     |
|-------------------------------------------------------------|----------------------------------------------------------------------------------------------------------------------------------------------------------------------------------------------------------------------------------------------------------------------------------------------------------------------------------------------------------------------------------------------------------------------------------------------------------------------------------------------------------------------------|
| Differentially expressed microRNAs after treatment with EFV |                                                                                                                                                                                                                                                                                                                                                                                                                                                                                                                            |
| hsa-let-7a-5p                                               | <i>UGT8</i> (experimentally observed); <i>CYP19A1</i> (high); <i>CYP4F2</i> (high); <i>FMO2</i> (high); <i>FMO4</i> (high); <i>KCNJ11</i> (high); <i>ABCC10</i> (moderate); <i>ABCC5</i> (moderate); <i>CHST3</i> (moderate); <i>CHST5</i> (moderate); <i>CYP46A1</i> (moderate); <i>GPX3</i> (moderate); <i>GPX7</i> (moderate); <i>NR112</i> (moderate); <i>SLC10A1</i> (moderate); <i>SLC10A2</i> (moderate); <i>SLC13A3</i> (moderate); <i>SLC5A6</i> (moderate); <i>SLCO2A1</i> (moderate); <i>SLCO5A1</i> (moderate) |
| hsa-miR-122-3p                                              | <i>ABCC5</i> (moderate); <i>ALDH9A1</i> (moderate); <i>SLC22A15</i> (moderate); <i>SLC28A2</i> (moderate)                                                                                                                                                                                                                                                                                                                                                                                                                  |
| hsa-miR-122-5p                                              | <i>GPX7</i> (experimentally observed); <i>CDA</i> (high); <i>CHST12</i> (high); <i>CYP7B1</i> (moderate); <i>GPX3</i> (moderate); <i>SLC15A1</i> (moderate); <i>SLC7A5</i> (moderate); <i>SLCO5A1</i> (moderate)                                                                                                                                                                                                                                                                                                           |
| hsa-miR-181c-5p                                             | <i>METAP1</i> (high); <i>CYP2R1</i> (moderate); <i>CYP3A5</i> (moderate); <i>FMO5</i> (moderate); <i>HSD11B1</i> (moderate); <i>SLC22A2</i> (moderate); <i>SULT1C2</i> (moderate)                                                                                                                                                                                                                                                                                                                                          |
| hsa-miR-193a-3p                                             | <i>SLC15A1</i> (high); <i>ALDH9A1</i> (moderate); <i>CHST3</i> (moderate); <i>CHST9</i> (moderate); <i>CYP11B2</i> (moderate); <i>CYP2S1</i> (moderate); <i>GSR</i> (moderate); <i>KCNJ11</i> (moderate); <i>MPO</i> (moderate); <i>NOS1</i> (moderate); <i>SLC22A8</i> (moderate); <i>SLC7A5</i> (moderate); <i>SLCO1A2</i> (moderate); <i>SLCO2A1</i> (moderate); <i>SULT1B1</i> (moderate); <i>SULT4A1</i> (moderate)                                                                                                   |
| hsa-miR-195-5p                                              | <i>GSTM4</i> (experimentally observed); <i>CBR3</i> (high); <i>GSTCD</i> (high); <i>ABCB5</i> (moderate); <i>ALDH1A3</i> (moderate); <i>ATP7A</i> (moderate); <i>CYP2S1</i> (moderate); <i>CYP7B1</i> (moderate); <i>GPX1</i> (moderate); <i>GSTT2/GSTT2B</i> (moderate); <i>KCNJ11</i> (moderate); <i>NOS1</i> (moderate); <i>PDE3B</i> (moderate); <i>SLC13A1</i> (moderate); <i>SLC22A17</i> (moderate); <i>SLC28A1</i> (moderate); <i>XDH</i> (moderate)                                                               |
| hsa-miR-197-3p                                              | <i>CBR1</i> (high); <i>CYP3A5</i> (high); <i>ABCB11</i> (moderate); <i>ALDH9A1</i> (moderate); <i>CHST2</i> (moderate); <i>CHST6</i> (moderate); <i>CYP20A1</i> (moderate); <i>DHRS1</i> (moderate); <i>EPHX2</i> (moderate); <i>GSTM5</i> (moderate); <i>IAPP</i> (moderate); <i>SULF1</i> (moderate); <i>SULT4A1</i> (moderate)                                                                                                                                                                                          |
| hsa-miR-19a-3p                                              | <i>CHST1</i> (high); <i>DHRS3</i> (high); <i>PON2</i> (high); <i>ABCA1</i> (moderate); <i>ABCB7</i> (moderate); <i>GSTM2</i> (moderate); <i>SLC6A6</i> (moderate); <i>SULF1</i> (moderate)                                                                                                                                                                                                                                                                                                                                 |
| hsa-miR-210-3p                                              | <i>ALDH5A1</i> (moderate); <i>CHST1</i> (moderate); <i>PDE3A</i> (moderate); <i>SLC6A6</i> (moderate); <i>SLCO4C1</i> (moderate)                                                                                                                                                                                                                                                                                                                                                                                           |
| hsa-miR-216b-5p                                             | <i>UGT2B28</i> (high); <i>CYP3A5</i> (moderate); <i>CYP7A1</i> (moderate); <i>SLC13A1</i> (moderate); <i>SLC16A1</i> (moderate); <i>SLC22A15</i> (moderate); <i>UGT2B10</i> (moderate); <i>UGT2B11</i> (moderate); <i>UGT2B4</i> (moderate); <i>UGT2B7</i> (moderate)                                                                                                                                                                                                                                                      |
| hsa-miR-221-3p                                              | <i>SOD2</i> (experimentally observed); <i>ADHFE1</i> (high); <i>HNMT</i> (high); <i>ALDH1A1</i> (moderate); <i>CYP1B1</i> (moderate); <i>CYP7A1</i> (moderate); <i>PDE3A</i> (moderate); <i>UGT2B15</i> (moderate)                                                                                                                                                                                                                                                                                                         |
| hsa-miR-22-5p                                               | <i>CYP4Z1</i> (high); <i>GSTM2</i> (high); <i>GSTT2/GSTT2B</i> (high); <i>ABCC1</i> (moderate); <i>CYP1A1</i> (moderate); <i>GPX5</i> (moderate); <i>SLCO1C1</i> (moderate); <i>TPMT</i> (moderate)                                                                                                                                                                                                                                                                                                                        |
| hsa-miR-25-3p                                               | <i>CHST1</i> (high); <i>CHST7</i> (high)                                                                                                                                                                                                                                                                                                                                                                                                                                                                                   |
| hsa-miR-27a-3p                                              | <i>CYP1B1</i> (experimentally observed); <i>RXRA</i> (experimentally observed); <i>PPARG</i> (experimentally observed); <i>ABCA1</i> (moderate); <i>ALDH4A1</i> (moderate); <i>AOX1</i> (moderate); <i>CHST1</i> (moderate); <i>CYP39A1</i> (moderate); <i>SLC16A1</i> (moderate); <i>UGT2B28</i> (moderate); <i>UGT8</i> (moderate)                                                                                                                                                                                       |
| hsa-miR-29b-3p                                              | <i>ABCB6</i> (high); <i>GPX7</i> (high); <i>GSTA4</i> (high); <i>SLC22A7</i> (high); <i>ADH1B</i> (moderate); <i>ATP7A</i> (moderate); <i>CYP2B6</i> (moderate); <i>CYP4F3</i> (moderate); <i>DHRS2</i> (moderate); <i>FMO1</i> (moderate); <i>GSTO2</i> (moderate); <i>SLC16A1</i> (moderate); <i>XDH</i> (moderate)                                                                                                                                                                                                      |
| hsa-miR-30b-5p                                              | <i>ALDH2</i> (high); <i>CYP24A1</i> (high); <i>SLCO6A1</i> (high); <i>CAT</i> (moderate); <i>CHST1</i> (moderate); <i>CHST2</i> (moderate); <i>PON2</i> (moderate); <i>SLC22A5</i> (moderate); <i>SLC6A6</i> (moderate)                                                                                                                                                                                                                                                                                                    |
| hsa-miR-383-5p                                              | <i>CYP3A5</i> (high); <i>DHRS13</i> (high); <i>ABCC11</i> (moderate); <i>ATP7B</i> (moderate); <i>CHST10</i> (moderate); <i>CYP27B1</i> (moderate); <i>CYP4F11</i> (moderate); <i>GPX5</i> (moderate); <i>GPX6</i> (moderate); <i>GSTK1</i> (moderate); <i>SLC22A11</i> (moderate); <i>SLC22A5</i> (moderate); <i>SLC2A5</i> (moderate); <i>SULT2A1</i> (moderate)                                                                                                                                                         |
| hsa-miR-422a                                                | <i>CHST2</i> (high); <i>ADHFE1</i> (moderate); <i>ALDH1B1</i> (moderate); <i>CDA</i> (moderate); <i>CHST3</i> (moderate); <i>CYP11B2</i> (moderate); <i>CYP7B1</i> (moderate); <i>CYP8B1</i> (moderate); <i>DDO</i> (moderate); <i>GSTM4</i> (moderate); <i>GSTO2</i> (moderate); <i>NOS3</i> (moderate); <i>SLC22A16</i> (moderate); <i>SLC7A7</i> (moderate); <i>SULF1</i> (moderate)                                                                                                                                    |
| hsa-miR-548d-3p                                             | <i>DHRS7C</i> (moderate); <i>SULT1B1</i> (moderate)                                                                                                                                                                                                                                                                                                                                                                                                                                                                        |
| hsa-miR-622                                                 | <i>ABCC12</i> (high); <i>ALDH6A1</i> (moderate); <i>CYP11B1</i> (moderate); <i>DDO</i> (moderate); <i>DHRS7B</i> (moderate); <i>GSTM5</i> (moderate); <i>PPARD</i> (moderate); <i>SLC22A18</i> (moderate); <i>SLC22A8</i> (moderate)                                                                                                                                                                                                                                                                                       |
| hsa-miR-876-3p                                              | <i>CYP3A5</i> (high); <i>ALDH1B1</i> (moderate); <i>ALDH3B1</i> (moderate); <i>CHST6</i> (moderate); <i>CYP27B1</i> (moderate); <i>CYP2B6</i> (moderate); <i>CYP2C18</i> (moderate); <i>PPARG</i> (moderate); <i>SLC22A12</i> (moderate); <i>SLC22A13</i> (moderate)                                                                                                                                                                                                                                                       |
| hsa-miR-885-5p                                              | <i>TPMT</i> (high); <i>ALDH1B1</i> (moderate); <i>UGT2B11</i> (moderate); <i>UGT2B28</i> (moderate)                                                                                                                                                                                                                                                                                                                                                                                                                        |
| hsa-miR-93-3p                                               | <i>GPX1</i> (high); <i>ABCA4</i> (moderate); <i>ABCC12</i> (moderate); <i>ADH6</i> (moderate); <i>CYP4B1</i> (moderate); <i>GSTT1</i> (moderate)                                                                                                                                                                                                                                                                                                                                                                           |

(continued)

SUPPLEMENTARY TABLE S4. (CONTINUED)

| MicroRNA                                                    | IPA target (level of confidence for prediction)                                                                                                                                                                                                                                                                                                                                                                                                                                                                                                                                                                                                    |
|-------------------------------------------------------------|----------------------------------------------------------------------------------------------------------------------------------------------------------------------------------------------------------------------------------------------------------------------------------------------------------------------------------------------------------------------------------------------------------------------------------------------------------------------------------------------------------------------------------------------------------------------------------------------------------------------------------------------------|
| Differentially expressed microRNAs after treatment with RMP |                                                                                                                                                                                                                                                                                                                                                                                                                                                                                                                                                                                                                                                    |
| hsa-let-7a-5p                                               | <i>UGT8</i> (experimentally observed); <i>CYP19A1</i> (high); <i>CYP4F2</i> (high); <i>FMO2</i> (high); <i>FMO4</i> (high); <i>KCNJ11</i> (high); <i>ABCC10</i> (moderate); <i>ABCC5</i> (moderate); <i>CHST3</i> (moderate); <i>CHST5</i> (moderate); <i>CYP46A1</i> (moderate); <i>GPX3</i> (moderate); <i>GPX7</i> (moderate); <i>NR112</i> (moderate); <i>SLC10A1</i> (moderate); <i>SLC10A2</i> (moderate); <i>SLC13A3</i> (moderate); <i>SLC5A6</i> (moderate); <i>SLCO2A1</i> (moderate); <i>SLCO5A1</i> (moderate)                                                                                                                         |
| hsa-miR-125b-1-3p                                           | <i>CAT</i> (moderate); <i>HNF4A</i> (moderate); <i>PDE3A</i> (moderate); <i>TPMT</i> (moderate)                                                                                                                                                                                                                                                                                                                                                                                                                                                                                                                                                    |
| hsa-miR-1260a                                               | <i>GSTCD</i> (high); <i>KCNJ11</i> (high); <i>ADHFE1</i> (moderate); <i>CHST11</i> (moderate); <i>CYP11B1</i> (moderate); <i>CYP11B2</i> (moderate); <i>CYP1B1</i> (moderate); <i>CYP4F11</i> (moderate); <i>CYP4F2</i> (moderate); <i>GPX4</i> (moderate); <i>SLC27A1</i> (moderate); <i>SLC28A3</i> (moderate); <i>SLCO4A1</i> (moderate); <i>UGT8</i> (moderate)                                                                                                                                                                                                                                                                                |
| hsa-miR-128-3p                                              | <i>ABCC12</i> (moderate); <i>ALDH4A1</i> (moderate); <i>CYP1A2</i> (moderate); <i>CYP2C19</i> (moderate); <i>CYP2C9</i> (moderate); <i>CYP39A1</i> (moderate); <i>CYP3A4</i> (moderate); <i>CYP4F2</i> (moderate); <i>GSTM2</i> (moderate); <i>PDE3A</i> (moderate); <i>PON2</i> (moderate); <i>PPARG</i> (moderate); <i>SLC5A6</i> (moderate); <i>SLC6A6</i> (moderate); <i>UGT8</i> (moderate)                                                                                                                                                                                                                                                   |
| hsa-miR-1291                                                | <i>ABCC1</i> (high); <i>CHST3</i> (high); <i>CHST6</i> (high); <i>CYB5R3</i> (high); <i>CYP1A1</i> (high); <i>CYP2A6</i> (high); <i>CYP2C18</i> (high); <i>GSTZ1</i> (high); <i>NR113</i> (high); <i>PPARD</i> (high); <i>SLC5A6</i> (high); <i>CHST7</i> (moderate); <i>CYP11B2</i> (moderate); <i>CYP2S1</i> (moderate); <i>CYP39A1</i> (moderate); <i>CYP3A5</i> (moderate); <i>DHRS13</i> (moderate); <i>DHRS7B</i> (moderate); <i>GPX3</i> (moderate); <i>HNF4A</i> (moderate); <i>KCNJ11</i> (moderate); <i>SLC16A1</i> (moderate); <i>SLC19A1</i> (moderate); <i>SLC29A2</i> (moderate); <i>SLC6A6</i> (moderate); <i>SLC7A5</i> (moderate) |
| hsa-miR-139-5p                                              | <i>ABCA1</i> (moderate); <i>PDE3A</i> (moderate); <i>SOD1</i> (moderate)                                                                                                                                                                                                                                                                                                                                                                                                                                                                                                                                                                           |
| hsa-miR-195-5p                                              | <i>GSTM4</i> (experimentally observed); <i>CBR3</i> (high); <i>GSTCD</i> (high); <i>ABCB5</i> (moderate); <i>ALDH1A3</i> (moderate); <i>ATP7A</i> (moderate); <i>CYP2S1</i> (moderate); <i>CYP7B1</i> (moderate); <i>GPX1</i> (moderate); <i>GSTT2/GSTT2B</i> (moderate); <i>KCNJ11</i> (moderate); <i>NOS1</i> (moderate); <i>PDE3B</i> (moderate); <i>SLC13A1</i> (moderate); <i>SLC22A17</i> (moderate); <i>SLC28A1</i> (moderate); <i>XDH</i> (moderate)                                                                                                                                                                                       |
| hsa-miR-20b-5p                                              | <i>PPARG</i> (experimentally observed); <i>PON2</i> (high); <i>ABCC9</i> (moderate); <i>ABCG2</i> (moderate); <i>ADHFE1</i> (moderate); <i>CYP3A5</i> (moderate); <i>METAP1</i> (moderate); <i>PDE3B</i> (moderate); <i>PPARA</i> (moderate); <i>SLC29A2</i> (moderate); <i>SLC2A4</i> (moderate)                                                                                                                                                                                                                                                                                                                                                  |
| hsa-miR-212-3p                                              | <i>ABCG1</i> (moderate); <i>CHST9</i> (moderate); <i>CYP19A1</i> (moderate); <i>CYP4F3</i> (moderate); <i>DDO</i> (moderate); <i>HSD11B1</i> (moderate); <i>SLCO4C1</i> (moderate); <i>SOD2</i> (moderate)                                                                                                                                                                                                                                                                                                                                                                                                                                         |
| hsa-miR-22-5p                                               | <i>CYP4Z1</i> (high); <i>GSTM2</i> (high); <i>GSTT2/GSTT2B</i> (high); <i>ABCC1</i> (moderate); <i>CYP1A1</i> (moderate); <i>GPX5</i> (moderate); <i>SLCO1C1</i> (moderate); <i>TPMT</i> (moderate)                                                                                                                                                                                                                                                                                                                                                                                                                                                |
| hsa-miR-29b-2-5p                                            | <i>ABCC1</i> (high); <i>PDE3A</i> (high); <i>ABCA4</i> (moderate); <i>CYP2J2</i> (moderate); <i>SLC13A3</i> (moderate); <i>SLC2A4</i> (moderate); <i>SULT2A1</i> (moderate)                                                                                                                                                                                                                                                                                                                                                                                                                                                                        |
| hsa-miR-425-3p                                              | <i>GSTT1</i> (moderate); <i>SLC10A1</i> (moderate)                                                                                                                                                                                                                                                                                                                                                                                                                                                                                                                                                                                                 |
| hsa-miR-500a                                                | <i>CYP3A5</i> (high); <i>AHR</i> (moderate); <i>DHRS2</i> (moderate)                                                                                                                                                                                                                                                                                                                                                                                                                                                                                                                                                                               |
| hsa-miR-577                                                 | <i>ADHFE1</i> (moderate); <i>CYP2J2</i> (moderate); <i>DHRS9</i> (moderate)                                                                                                                                                                                                                                                                                                                                                                                                                                                                                                                                                                        |
| hsa-miR-597-5p                                              | <i>ABCB11</i> (moderate); <i>ADH1B</i> (moderate); <i>CHST6</i> (moderate); <i>CYP1B1</i> (moderate); <i>SLC5A6</i> (moderate); <i>SLCO1A2</i> (moderate); <i>SLCO3A1</i> (moderate)                                                                                                                                                                                                                                                                                                                                                                                                                                                               |
| hsa-miR-625-3p                                              | <i>CYP3A7</i> (moderate); <i>IAPP</i> (moderate)                                                                                                                                                                                                                                                                                                                                                                                                                                                                                                                                                                                                   |
| hsa-miR-642a-5p                                             | <i>CYP2A6</i> (high); <i>CYP2C18</i> (moderate); <i>GPX5</i> (moderate); <i>SLC28A1</i> (moderate)                                                                                                                                                                                                                                                                                                                                                                                                                                                                                                                                                 |
| hsa-miR-876-3p                                              | <i>CYP3A5</i> (high); <i>ALDH1B1</i> (moderate); <i>ALDH3B1</i> (moderate); <i>CHST6</i> (moderate); <i>CYP27B1</i> (moderate); <i>CYP2B6</i> (moderate); <i>CYP2C18</i> (moderate); <i>PPARG</i> (moderate); <i>SLC22A12</i> (moderate); <i>SLC22A13</i> (moderate)                                                                                                                                                                                                                                                                                                                                                                               |
| hsa-miR-885-5p                                              | <i>TPMT</i> (high); <i>ALDH1B1</i> (moderate); <i>UGT2B11</i> (moderate); <i>UGT2B28</i> (moderate)                                                                                                                                                                                                                                                                                                                                                                                                                                                                                                                                                |
| hsa-miR-93-3p                                               | <i>GPX1</i> (high); <i>ABCA4</i> (moderate); <i>ABCC12</i> (moderate); <i>ADH6</i> (moderate); <i>CYP4B1</i> (moderate); <i>GSTT1</i> (moderate)                                                                                                                                                                                                                                                                                                                                                                                                                                                                                                   |
| hsa-miR-99a-3p                                              | <i>ALDH1A3</i> (moderate); <i>CYP1A1</i> (moderate); <i>GSTM5</i> (moderate); <i>SLCO4C1</i> (moderate); <i>UGT2B4</i> (moderate)                                                                                                                                                                                                                                                                                                                                                                                                                                                                                                                  |
| hsa-miR-99a-5p                                              | <i>NR113</i> (high)                                                                                                                                                                                                                                                                                                                                                                                                                                                                                                                                                                                                                                |

IPA, Ingenuity Pathway Analysis.
